# Supplementary material for: Identification of new candidate therapeutic target genes in head and neck squamous cell carcinomas
Source: PubMed Central journal article supplement (PMC5216951; doi:10.18632/oncotarget.10163), 2016-06-18
Supplement: oncotarget-07-47418-s001.pdf [file oncotarget-07-47418-s001.pdf]

# Identification of new candidate therapeutic target genes in head and neck squamous cell carcinomas

## Supplementary Materials

**Supplementary Table S1: Selection of targeted therapies matching 42 selected druggable genes**

| Signalling pathway                                     | Gene symbols  | Names of genes                                                | Chromosome location | Genbank accession number | Selected therapies                                                                                          |
|--------------------------------------------------------|---------------|---------------------------------------------------------------|---------------------|--------------------------|-------------------------------------------------------------------------------------------------------------|
| Growth factors, tyrosine kinase receptors, and ligands | <i>EGFR</i>   | epidermal growth factor receptor                              | 7p12                | NM_005228.3              | cetuximab, gefitinib, erlotinib, lapatinib, afatinib, neratinib, panitumumab                                |
|                                                        | <i>ERBB2</i>  | erb-b2 receptor tyrosine kinase 2                             | 17q12               | NM_004448.3              | trastuzumab, lapatinib, afatinib, neratinib                                                                 |
|                                                        | <i>ERBB3</i>  | erb-b2 receptor tyrosine kinase 3                             | 12q13               | NM_001982.3              | pertuzumab, MM121                                                                                           |
|                                                        | <i>ERBB4</i>  | erb-b2 receptor tyrosine kinase 4                             | 2q33.3-q34          | NM_005235.2              | neratinib                                                                                                   |
|                                                        | <i>FGFR1</i>  | fibroblast growth factor receptor 1                           | 8p11.23-p11.22      | NM_015850.3              | vandetanib, PD173074                                                                                        |
|                                                        | <i>FGFR2</i>  | fibroblast growth factor receptor 2                           | 10q26               | NM_000141.4              | vandetanib, PD173075                                                                                        |
|                                                        | <i>FGFR3</i>  | fibroblast growth factor receptor 3                           | 4p16.3              | NM_000142.4              | vandetanib, PD173076, dovitinib                                                                             |
|                                                        | <i>IGF1R</i>  | insulin-like growth factor 1 receptor                         | 15q26.3             | NM_000875.4              | linsitinib, dalotuzumab                                                                                     |
|                                                        | <i>IGF2</i>   | insulin-like growth factor 2                                  | 11p15.5             | NM_000612.5              |                                                                                                             |
|                                                        | <i>MET</i>    | MET proto-oncogene, receptor tyrosine kinase                  | 7q31                | NM_000245.2              | crizotinib, foretinib                                                                                       |
|                                                        | <i>HGF</i>    | hepatocyte growth factor (hepatopoietin A, scatter factor)    | 7q21.1              | NM_000601.4              |                                                                                                             |
|                                                        | <i>ALK</i>    | anaplastic lymphoma receptor tyrosine kinase                  | 2p23                | NM_004304.4              | crizotinib                                                                                                  |
|                                                        | <i>ROS1</i>   | ROS proto-oncogene 1, receptor tyrosine kinase                | 6q22                | NM_002944.2              |                                                                                                             |
|                                                        | <i>PDGFR4</i> | platelet-derived growth factor receptor, alpha polypeptide    | 4q12                | NM_006206.4              | imatinib, sunitinib, sorafenib, pazopanib, vatalanib, tandutinib, nilotinib, motesanib, vandetanib          |
|                                                        | <i>PDGFRB</i> | platelet-derived growth factor receptor, beta polypeptide     | 5q33.1              | NM_002609.3              |                                                                                                             |
|                                                        | <i>VEGFA</i>  | vascular endothelial growth factor A                          | 6p12                | NM_003376.5              | bevacizumab                                                                                                 |
|                                                        | <i>VEGFB</i>  | vascular endothelial growth factor B                          | 11q13               | NM_003377.4              | afibercept                                                                                                  |
|                                                        | <i>PGF</i>    | placental growth factor                                       | 14q24.3             | NM_002632.5              | afibercept                                                                                                  |
|                                                        | <i>VEGFR1</i> | fms-related tyrosine kinase 1                                 | 13q12               | NM_002019.4              | sunitinib, sorafenib, pazopanib, vatalanib, apatinib, motesanib, cediranib, vandetanib                      |
|                                                        | <i>VEGFR2</i> | kinase insert domain receptor                                 | 4q11-q12            | NM_002253.2              | sunitinib, sorafenib, pazopanib, vatalanib, apatinib, brivanib, motesanib, cediranib, vandetanib, foretinib |
|                                                        | <i>VEGFR3</i> | fms-related tyrosine kinase 4                                 | 5q35.3              | NM_002020.4              | sunitinib, sorafenib, pazopanib, vatalanib, apatinib, motesanib, cediranib, vandetanib                      |
|                                                        | <i>TEK</i>    | TEK tyrosine kinase, endothelial                              | 9p21                | NM_000459.4              | bevacizumab                                                                                                 |
|                                                        | <i>KIT</i>    | v-kit Hardy-Zuckerman 4 feline sarcoma viral oncogene homolog | 4q12                | NM_021099.3              | imatinib, sunitinib, sorafenib, pazopanib, vatalanib, tandutinib, nilotinib, apatinib, motesanib            |
|                                                        | <i>KITLG</i>  | KIT ligand                                                    | 12q22               | NM_000899.4              | imatinib, nilotinib, bafetinib                                                                              |
|                                                        | <i>DDR2</i>   | discoidin domain receptor tyrosine kinase 2                   | 1q23.3              | NM_006182.2              |                                                                                                             |
|                                                        | <i>ABL1</i>   | ABL proto-oncogene 1, non-receptor tyrosine kinase            | 9q34.1              | NM_005157.5              | imatinib, nilotinib, dasatinib                                                                              |

|                             |                   |                                                                                  |             |             |                                                               |
|-----------------------------|-------------------|----------------------------------------------------------------------------------|-------------|-------------|---------------------------------------------------------------|
|                             | <i>CSF1R</i>      | colony stimulating factor 1 receptor                                             | 5q32        | NM_005211.3 | sunitinib, vatalanib                                          |
|                             | <i>SRC</i>        | SRC proto-oncogene, non-receptor tyrosine kinase                                 | 20q12-q13   | NM_005417.4 | dasatinib, bosutinib, apatinib                                |
|                             | <i>RET</i>        | ret proto-oncogene                                                               | 10q11.2     | NM_020630.4 | sunitinib, motesanib                                          |
| <b>JAK-STAT pathway</b>     | <i>JAK2</i>       | janus kinase 2                                                                   | 9p24        | NM_004972.3 | lestaurtinib                                                  |
|                             | <i>STAT3</i>      | signal transducer and activator of transcription 3 (acute-phase response factor) | 17q21.31    | NM_003150.3 | atiprimod                                                     |
| <b>Cell Differentiation</b> | <i>NOTCH1</i>     | notch 1                                                                          | 9q34.3      | NM_017617.3 | MK0752, PF-03084014, RO4929097, R4733                         |
|                             | <i>NOTCH2</i>     | notch 2                                                                          | 1p13-p11    | NM_024408.3 | MK0752, PF-03084014, RO4929097, R4733, tarextumab             |
|                             | <i>NOTCH4</i>     | notch4                                                                           | 6p21.3      | NM_004557.3 | MK0752, PF-03084014, RO4929097, R4733                         |
|                             | <i>DLL4</i>       | delta-like 4 (Drosophila)                                                        | 15q14       | NM_019074.3 | REGN421                                                       |
|                             | <i>SMO</i>        | smoothened, frizzled class receptor                                              | 7q32.3      | NM_005631.4 | vismodegib, patidegib, erismodegib, taladegib                 |
| <b>PI3K-AKT-mTOR</b>        | <i>AKT1</i>       | v-akt murine thymoma viral oncogene homolog 1                                    | 14q32.32    | NM_005163.2 | AZD5363, MK2206, perifosine, ipatasertib (GDC-0068)           |
|                             | <i>PIK3CA</i>     | phosphatidylinositol-4,5-bisphosphate 3-kinase, catalytic subunit alpha          | 3q26.3      | NM_006218.2 | buparlisib (BKM120), copanlisib, taselisib (GDC-0032)         |
| <b>Cell Cycle</b>           | <i>CDK4</i>       | cyclin-dependent kinase 4                                                        | 12q14.3-q15 | NM_000075.3 | palbociclib, RGB-286638, R547, P1446-05, BAY1000394, ZK304709 |
|                             | <i>CDK6</i>       | cyclin-dependent kinase 6                                                        | 7q21-q22    | NM_001259.6 | palbociclib, R547                                             |
|                             | <i>MDM2</i>       | MDM2 proto-oncogene, E3 ubiquitin protein ligase                                 | 12q14.3-q15 | NM_002392.5 | idasanutlin, RO5503781                                        |
| <b>Immune response</b>      | <i>PDL1/CD274</i> | CD274 molecule                                                                   | 9p24        | NM_014143.3 | avelumab, tremelimumab, atezolizumab, BMS-936559              |
| <b>Controls</b>             | <i>CCND1</i>      | cyclin D1                                                                        | 11q13       | NM_053056.2 | _                                                             |
|                             | <i>MKI67</i>      | marker of proliferation Ki-67                                                    | 10q26.2     | NM_002417.4 | _                                                             |

**Supplementary Table S2: Primers used for quantitative RT-PCR for the 42 selected genes and *CCND1*, *MKI67*, *TBP* controls**

| Gene              | Upper sequence (5' à 3')                | Lower sequence (5' à 3')                | Amplicon size (pb) |
|-------------------|-----------------------------------------|-----------------------------------------|--------------------|
| <i>EGFR</i>       | 5' GGA GAA CTG CCA GAA ACT GAC C 3'     | 5' GCC TGC AGC ACA CTG GTT G 3'         | 106                |
| <i>ERBB2</i>      | 5' AGC CGC GAG CAC CCA AGT 3'           | 5' TTG GTG GGC AGG TAG GTG AGT T 3'     | 147                |
| <i>ERBB3</i>      | 5' GTCTGTGTGACCCACTGCAACT 3'            | 5' GGGTGGCAGGAGAAGCATT 3'               | 80                 |
| <i>ERBB4</i>      | 5' GGC TGC TGA GTT TTC AAG GAT G 3'     | 5' GCT TCA TAC GAT CAT CAC CCT GA 3'    | 74                 |
| <i>FGFR1</i>      | 5' GAA TTG GAG GCT ACA AGG TCC GTT 3'   | 5' GGT TGA TGC TGC CGT ACT CAT TCT 3'   | 118                |
| <i>FGFR2</i>      | 5' GGC CGT GAA GAT GTT GAA AGA TG 3'    | 5' CCT GTG TGC AGG CTC CAA GAA 3'       | 128                |
| <i>FGFR3</i>      | 5' GGCTGAAGAACGGCAGGGAGT 3'             | 5' CTGCTGATGCCGCAGCTTGA 3'              | 68                 |
| <i>IGF1R</i>      | 5' CCAAGGCCTGAAAACCTCCATCT 3'           | 5' ACACATTCTCGCTGATCCTCAACT3'           | 116                |
| <i>IGF2</i>       | 5' CGA CCG TGC TTC CGG ACA AC 3'        | 5' AGG CGC TGG GTG GAC TGC TT 3'        | 85                 |
| <i>MET</i>        | 5' ATG GGT CAA TTC AGC GAA GTC C 3'     | 5' GAT CGA GAA ACC ACA ACC TGC AT 3'    | 119                |
| <i>HGF</i>        | 5' CCC TGG TGT TTC ACA AGC AAT C 3'     | 5' GGT CAT GCA TTC AAC TTC TGA ACA 3'   | 81                 |
| <i>KIT</i>        | 5' TCC TCG CCT CCA AGA ATT GTA T 3'     | 5' CTT GAT GTC TCT GGC TAG ACC AAA 3'   | 111                |
| <i>KITLG</i>      | 5' ACG TCA CTA AAT TGG TGG CAA ATC 3'   | 5' GCT TAT CCA ACA ATG ACT TGG CA 3'    | 98                 |
| <i>RET</i>        | 5' GCC ACC GAC CAG CAG ACC T 3'         | 5' GCC TCC TCG GCC ACA TAT GA 3'        | 80                 |
| <i>CSF1R</i>      | 5' GATGGGTGGCAGGAAGGTGA 3'              | 5' GGGCCCTGGGATGACTTTCT 3'              | 67                 |
| <i>PDGFRA</i>     | 5' CAT TTA CAT CTA TGT GCC AGA CCC A 3' | 5' ATG GCA GAA TCA TCA TCC TCC AC 3'    | 93                 |
| <i>PDGFRB</i>     | 5' CCC CAG TGC CGA GTT AGA AGA C 3'     | 5' GCA CGT AGC CGC TCT CAA CC 3'        | 116                |
| <i>ALK</i>        | 5' CGG AGG ATA TAT AGG CGG CAA T 3'     | 5' ATG CCC AGT GGA CTG ATG AAG GA 3'    | 90                 |
| <i>SRC</i>        | 5' ACC ACC TTT GTG GCC CTC TAT G 3'     | 5' GCC ACC AGT CTC CCT CTG TGT T 3'     | 109                |
| <i>DDR2</i>       | 5' TCC AGT CAC CGA CCA CTC CAT 3'       | 5' GTA AGA CAC CAA GCC ATC TAG CCA 3'   | 82                 |
| <i>ROS1</i>       | 5' GATGGCAACGTTTTATGGTCCTT 3'           | 5' TCTAGCTGCCAGATCCCTGTGA 3'            | 126                |
| <i>VEGFA</i>      | 5' CTT GCC TTG CTG CTC TAC CTC C 3'     | 5' CAT CCA TGA ACT TCA CCA CTT CGT 3'   | 103                |
| <i>VEGFB</i>      | 5' GGT GCC CAG CTG CGT GAC T 3'         | 5' CCG GAT CAT GAG GAT CTG CAT C 3'     | 112                |
| <i>VEGFR1</i>     | 5' ATC ATT CCG AAG CAA GGT GTG AC 3'    | 5' TCC TTC TAT TAT TGC CAT GCG CT 3'    | 122                |
| <i>VEGFR2</i>     | 5' TGG GAA CCG GAA CCT CAC TAT C 3'     | 5' GTC TTT TCC TGG GCA CCT TCT ATT 3'   | 132                |
| <i>VEGFR3</i>     | 5' GTC ACG CTG CGC TCG CAA A 3'         | 5' GTG CAG CAG TGG CGT GGA CA 5'        | 99                 |
| <i>PGF</i>        | 5' GCTCGTCAGAGGTGGAAGTGGT 3'            | 5' CTCGCTGGGGTACTCGGACA 3'              | 103                |
| <i>STAT3</i>      | 5' GCT TCC TGC AAG AGT CGA ATG TT 3'    | 5' GGC TTC TCA AGA TAC CTG CTC TGA 3'   | 85                 |
| <i>MDM2</i>       | 5' GCG TGC CAA GCT TCT CTG TGA 3'       | 5' CTG AGT CCG ATG ATT CCT GCT GA 3'    | 96                 |
| <i>ABL1</i>       | 5' GCCAGTACGGGGAGGTGTACGA 3'            | 5' CTCCATGGTGTCTCCTTCAAGGT 3'           | 96                 |
| <i>NOTCH1</i>     | 5' TGC GTG CAG CGC GTC AAT GAC T 3'     | 5' CAG CGG CGC CCG GTG TGA 3'           | 62                 |
| <i>NOTCH2</i>     | 5' CAC CTG CCC ACA AGG CTA CA 3'        | 5' CAC AAG GAT TGC TAT TGG CCA T 3'     | 80                 |
| <i>NOTCH4</i>     | 5' GTGCATCTGCCTGCCTGGATT 3'             | 5' CCCACCATGGCACAGGGA 3'                | 85                 |
| <i>JAK2</i>       | 5' GACTTTTGTCTGTTCGAGCGAGAA 3'          | 5' CTTTGTCCCACTGAGGTTGTACTCTT 3'        | 94                 |
| <i>SMO</i>        | 5' GCT ACT TCC TCA TCC GAG GAG TCA 3'   | 5' GGC GCA GCA TGG TCT CGT T 3'         | 108                |
| <i>TEK</i>        | 5' GTC AGC TTG CTC CTT CTG GAA CT 3'    | 5' GAG GCA ATG CAG GTG AGA GAT GT 3'    | 107                |
| <i>AKT1</i>       | 5' CCC AGG TCA CGT CGG AGA CT 3'        | 5' ACT CCA TGC TGT CAT CTT GGT CA 3'    | 99                 |
| <i>PIK3CA</i>     | 5' CCTGATCTTCCTCGTGCTGCTC 3'            | 5' ATGCCAATGGACAGTGTTCCTCTT 3'          | 92                 |
| <i>CDK4</i>       | 5' CCA ATG TTG TCC GGC TGA TG 3'        | 5' CTA CAT GCT CAA ACA CCA GGG TTA C 3' | 84                 |
| <i>CDK6</i>       | 5' CCC AAC GTG GTC AGG TTG TTT 3'       | 5' GTG GTC AAG TCT TGA TCG ACA TGT T 3' | 101                |
| <i>PDL1/CD274</i> | 5' GCTGAATTGGTCATCCCAGAACTAC 3'         | 5' AAACGGAAGATGAATGTCAGTGCTAC 3'        | 95                 |
| <i>DLL4</i>       | 5' AAT GGA GGC AGC TGT AAG GAC C 3'     | 5' AAG GTG CTG TGT TCA CAA TGC AG 3'    | 90                 |
| <i>MKI67</i>      | 5' ATT GAA CCT GCG GAA GAG CTG A 3'     | 5' GGA GCG CAG GGA TAT TCC CTT A 3'     | 105                |

|              |                             |                            |     |
|--------------|-----------------------------|----------------------------|-----|
| <b>CCND1</b> | 5' GGATGCTGGAGGTCTGCGA 3'   | 5' AGAGGCCACGAACATGCAAG 3' | 128 |
| <b>TBP</b>   | 5' TGCACAGGAGCCAAGAGTGAA 3' | 5' CACATCACAGTCCCCACCA 3'  | 112 |

**Supplementary Table S3: Association between clinical and biological characteristics of the 46 HNSCC patients with high expression levels of *PIK3CA*, compared to the patients with low expression levels of *PIK3CA***

|                                     | Whole cohort           | <i>PIK3CA</i> high expression | <i>p</i> <sup>a</sup> |
|-------------------------------------|------------------------|-------------------------------|-----------------------|
|                                     | Number of patients (%) | Number of patients (%)        |                       |
| <b>Total</b>                        | 96                     | 46 (47.9)                     |                       |
| <i>Age</i>                          |                        |                               |                       |
| < 56                                | 46 (53.1)              | 24 (52.2)                     | 0.42                  |
| > 56                                | 50 (46.9)              | 22 (44)                       |                       |
| <i>Sexe</i>                         |                        |                               | <b>0.0089</b>         |
| male                                | 77 (80.2)              | 42 (54.5)                     |                       |
| female                              | 19 (19.8)              | 4 (21.1)                      |                       |
| <i>HPV status</i>                   |                        |                               |                       |
| positive                            | 12 (12.5)              | 3 (25.0)                      | 0.089                 |
| negative                            | 84 (87.5)              | 43 (51.1)                     |                       |
| <i>Alcool</i> <sup>b</sup>          |                        |                               |                       |
| Yes                                 | 50 (70.4)              | 28 (56.0)                     | <b>0.013</b>          |
| No                                  | 21 (29.6)              | 5 (23.8)                      |                       |
| <i>Tobacco</i> <sup>c</sup>         |                        |                               |                       |
| Yes                                 | 58 (72.5)              | 31 (53.4)                     | <b>0.036</b>          |
| No                                  | 22 (27.5)              | 6 (27.3)                      |                       |
| <i>AJCC Stage</i>                   |                        |                               |                       |
| stage I                             | 10 (10.4)              | 2 (20)                        | <b>0.014</b>          |
| stage II                            | 15 (15.6)              | 3 (20)                        |                       |
| stage III                           | 12 (12.5)              | 7 (58.3)                      |                       |
| stage IV                            | 59 (61.5)              | 34 (57.6)                     |                       |
| <i>Tumor Location</i>               |                        |                               |                       |
| Oral cavity                         | 43 (44.8)              | 13 (30.2)                     | <b>0.0011</b>         |
| Oropharynx                          | 20 (20.8)              | 9 (45)                        |                       |
| Larynx                              | 17 (17.7)              | 10 (58.8)                     |                       |
| Hypopharynx                         | 16 (16.7)              | 14 (87.5)                     |                       |
| <i>HRAS, NRAS, PIK3CA</i> mutations | 12 (12.5)              | 5 (41.6)                      | 0.64                  |
| <i>HRAS, NRAS, PIK3CA</i> wild type | 84 (87.5)              | 41 (48.8)                     |                       |

<sup>a</sup>Chi2 test.

<sup>b</sup>Tobacco use was considered at 10 packyears or more. Information available for 71 patients.

<sup>c</sup>Alcohol use was considered at 10 gr/day or more (ie. alcohol unit). Information available for 80 patients.
